# Supplementary material
Source: Springer Nature journal article supplement (https://www.springermedizin.de/resource/supplementary/12943_2013_1229_MOESM9_ESM.pdf/9553080)

A)

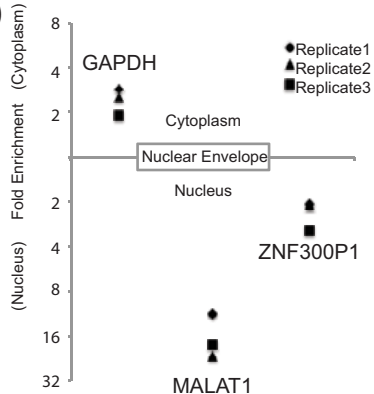

B)

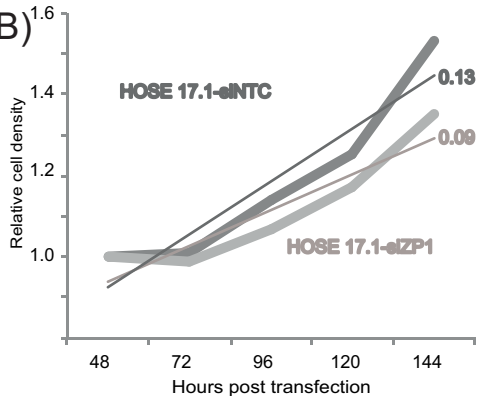

C)

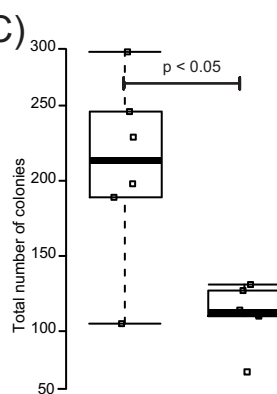

D)

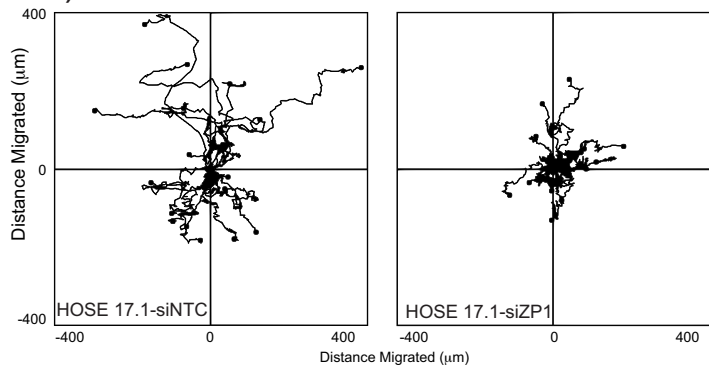

E)

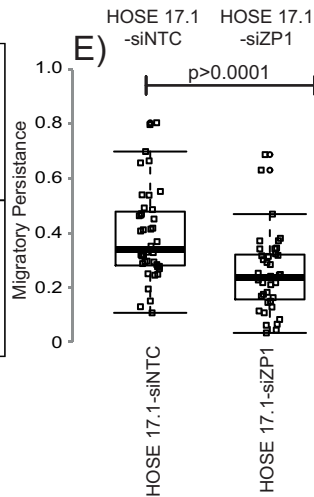

Supplement: MOESM9 [file 9553080]
